# Supplementary material for: Activation of DR3 signaling causes loss of ILC3s and exacerbates intestinal inflammation
Source: PubMed Central journal article supplement (PMC6662828; doi:10.1038/s41467-019-11304-8), 2019-07-29
Supplement: 41467_2019_11304_MOESM1_ESM.pdf [file 41467_2019_11304_MOESM1_ESM.pdf]

# **Activation of DR3 signaling causes loss of ILC3s and exacerbates intestinal inflammation**

Li, Shi, et al.

# Supplementary Figure 1

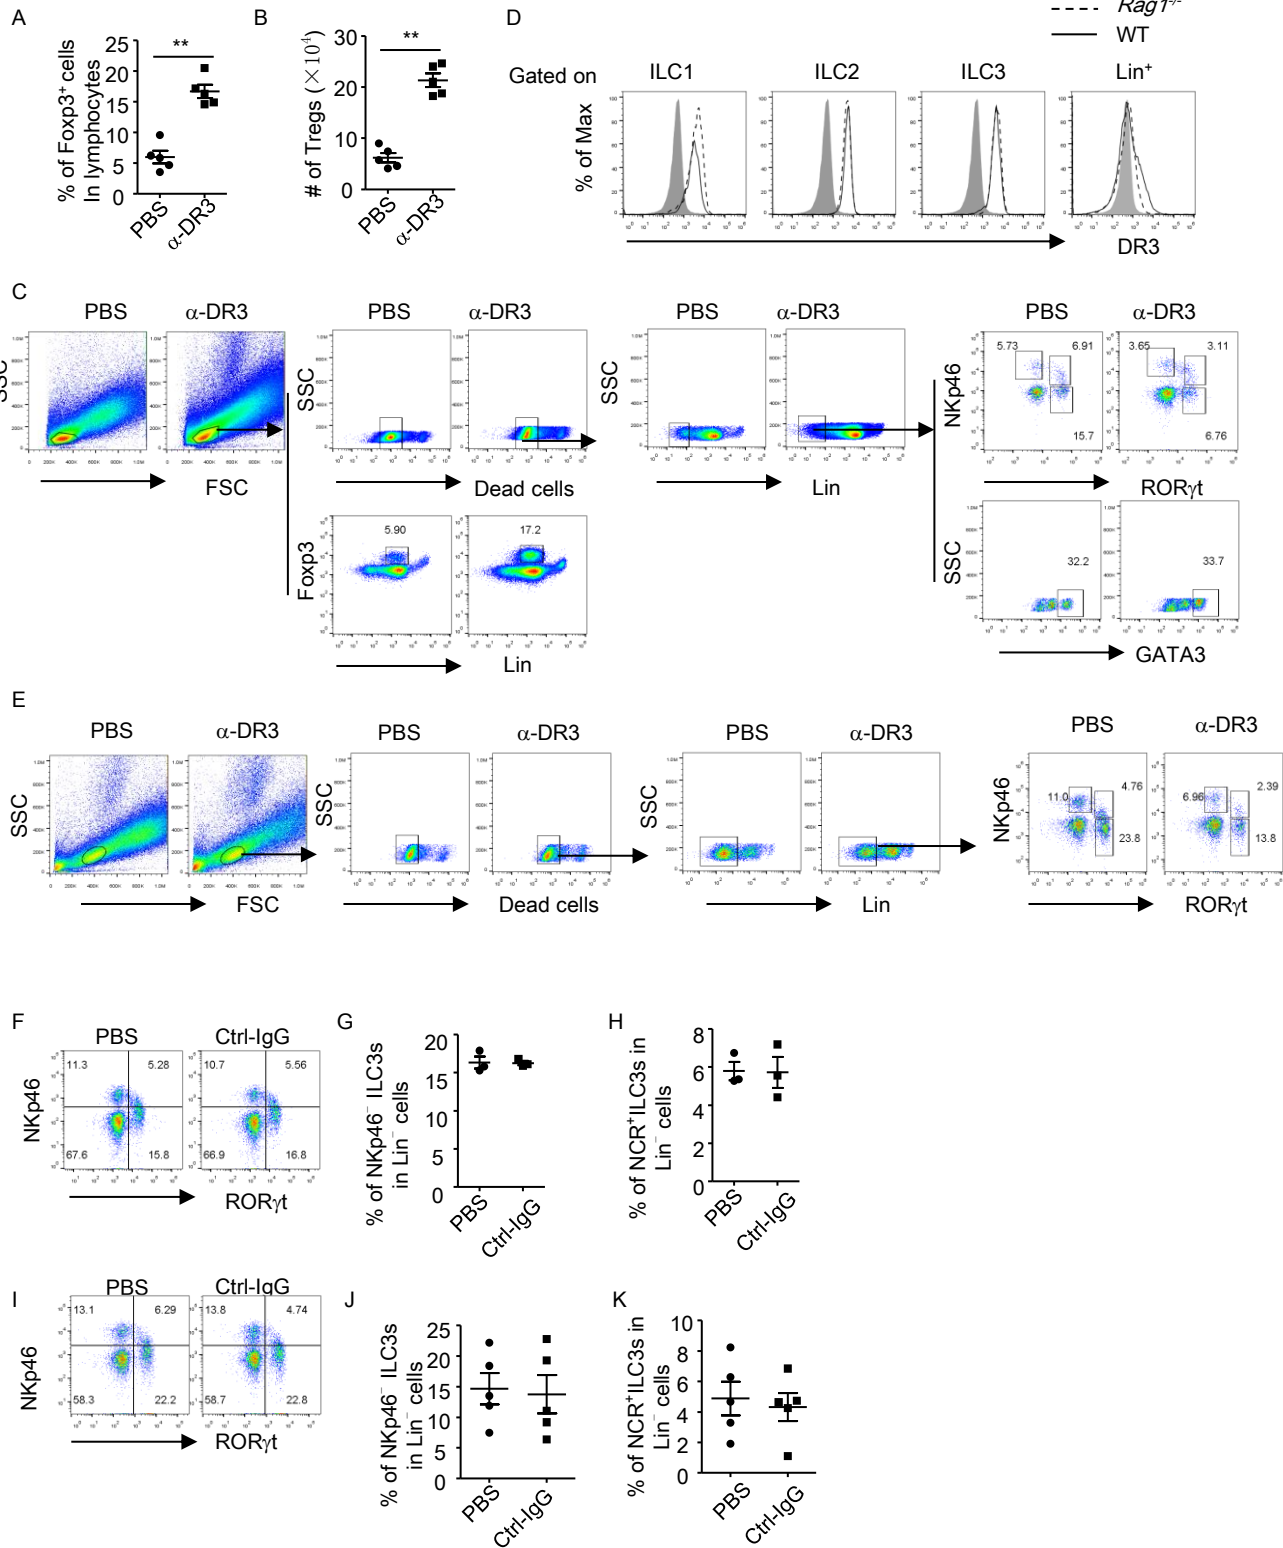

## Supplementary Figure 1. DR3 is expressed by intestinal ILCs and $\alpha$ -DR3 expands large intestinal Tregs.

(A and B) Wild-type mice were treated with  $\alpha$ -DR3 antibody (4C12) and large intestinal lamina propria lymphocytes (LPLs) were isolated for analysis 4 days later. (A) Expression of Lineage (Lin, CD3, B220, CD11b, CD11c) markers and Foxp3 was analyzed by flow cytometry. Percentages of Lin<sup>+</sup>Foxp3<sup>+</sup> (Tregs) cells gated on lymphocytes were shown. (B) Total numbers of Tregs were shown. (C) Gating strategy for Figures 1A-1E. (D) Histogram expression of DR3 gated on ILC1 (Lin<sup>-</sup>NKp46<sup>+</sup>ROR $\gamma$ t<sup>-</sup>), ILC2 (Lin<sup>-</sup>GATA3<sup>high</sup>), ILC3 (Lin<sup>-</sup>ROR $\gamma$ t<sup>+</sup>) and Lin<sup>+</sup> cells (CD11b<sup>+</sup>CD11c<sup>+</sup> for *Rag1*<sup>-/-</sup> mice and CD3<sup>+</sup>B220<sup>+</sup>CD11b<sup>+</sup>CD11c<sup>+</sup> for wild-type mice) from large intestinal LPLs of wild-type (solid line) or *Rag1*<sup>-/-</sup> mice (dashed line) under the steady-state was analyzed by flow cytometry. Shaded area was fluorescence minus one (FMO) staining from *Rag1*<sup>-/-</sup> mice as negative control. (E) Gating strategy for Figures 1G-1I. (F-H) Wild-type mice or *Rag1*<sup>-/-</sup> mice (I-K) were treated with PBS or Hamster IgG. Large intestinal LPLs were isolated 4 days later. (F-K) Expression of ROR $\gamma$ t, NKp46 and lineage markers was analyzed by flow cytometry. (F and I) Expression of ROR $\gamma$ t and NKp46 gated on Lin<sup>-</sup> cells were shown. (G, H, J and K) Percentages of NKp46<sup>-</sup>ILC3s (Lin<sup>-</sup>NKp46<sup>-</sup>ROR $\gamma$ t<sup>+</sup>) and NCR<sup>+</sup>ILC3s (Lin<sup>-</sup>NKp46<sup>+</sup>ROR $\gamma$ t<sup>+</sup>) gated on Lin<sup>-</sup> cells were shown. Data are means  $\pm$  SEM. (A-K) Data are representative of at least two independent experiments. Source data are provided as a Source Data File.

## Supplementary Figure 2

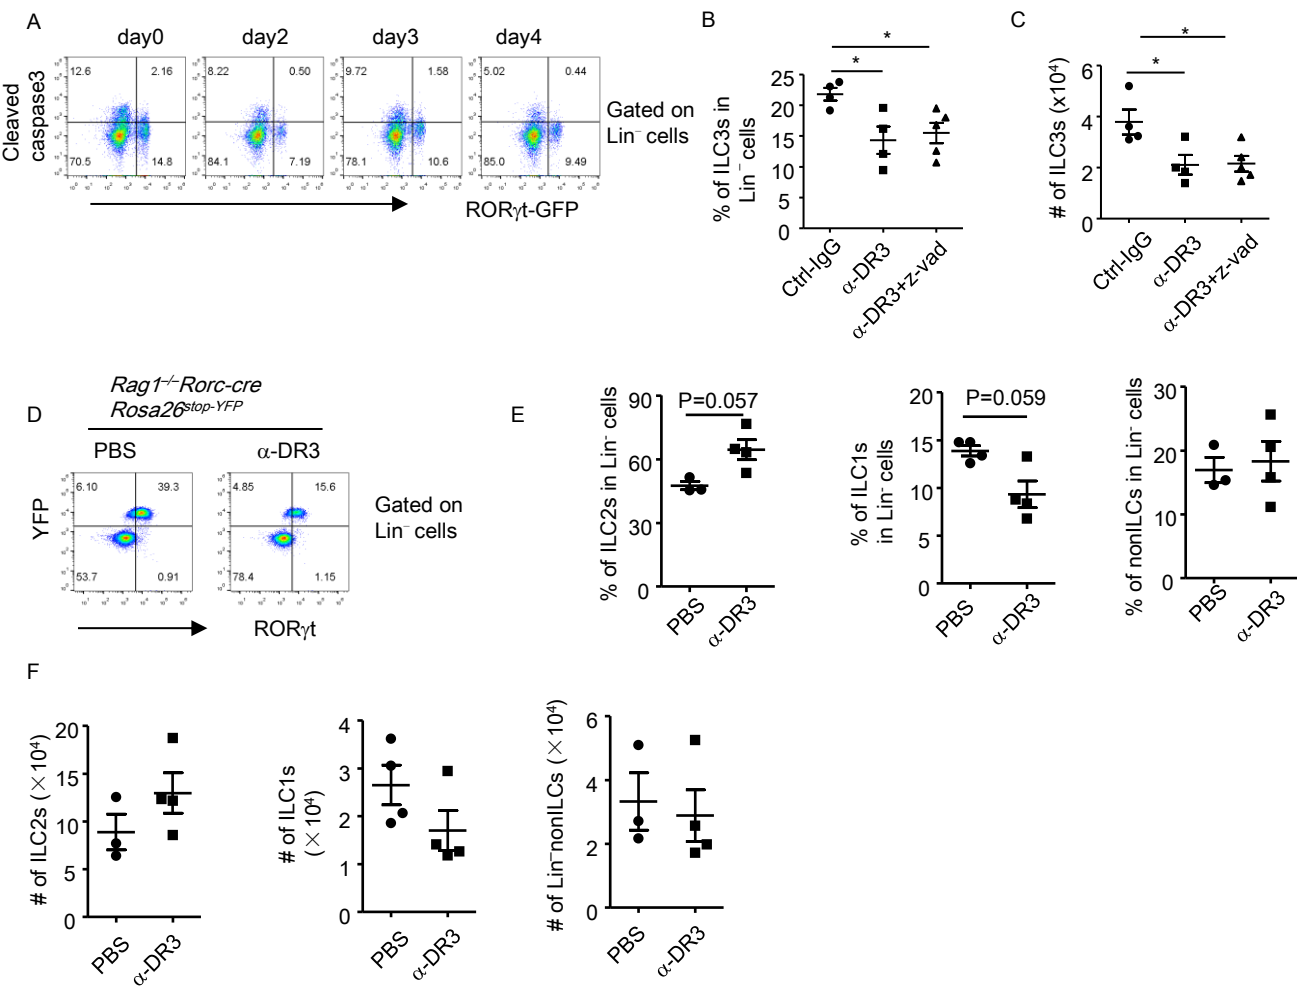

### Supplementary Figure 2. Loss of ILC3s driven by $\alpha$ -DR3 is not due to cell apoptosis or fate conversion *in situ*.

*Rorc<sup>flp/+</sup>* (A), *Rag1<sup>-/-</sup>Rorc-creRosa26<sup>stop-YFP</sup>* (D) or *Rag1<sup>-/-</sup>* mice (E and F) were treated with  $\alpha$ -DR3. Large intestinal LPLs were analyzed by flow cytometry 4 days later (B-F) or at indicated time points upon  $\alpha$ -DR3 treatment (A). (A-F) Expression of Lin, ROR $\gamma$ t-GFP, ROR $\gamma$ t (intracellular staining), cleaved caspase 3, YFP, GATA3 and NKp46 was analyzed by flow cytometry. (A) Expression of cleaved caspase 3 and ROR $\gamma$ t-GFP gated on Lin<sup>-</sup> cells were shown. (D) Expression of YFP and ROR $\gamma$ t gated on Lin cells were shown. Percentages of ILC2 (Lin<sup>-</sup>GATA3<sup>+</sup>), ILC1 (Lin<sup>-</sup>NKp46<sup>+</sup>ROR $\gamma$ t<sup>-</sup>) and nonILC (Lin<sup>-</sup>GATA3<sup>-</sup>NKp46<sup>-</sup>ROR $\gamma$ t<sup>-</sup>) in Lin<sup>-</sup> cells (E) and total numbers of indicated populations (F) were shown. (B and C) Wild-type mice were treated with Hamster IgG or  $\alpha$ -DR3.  $\alpha$ -DR3-treated mice were treated daily with DMSO or z-VAD-FMK (300ug). Expression of Lineage markers, ROR $\gamma$ t and NKp46 gated on Lin<sup>-</sup> cells from large intestinal LPLs were analyzed by flow cytometry on day 4 after  $\alpha$ -DR3 treatment. (B) Percentages of ILC3s (Lin<sup>-</sup>ROR $\gamma$ t<sup>+</sup>) gated on Lin<sup>-</sup> cells were shown. (C) Total numbers of ILC3s from indicated groups were shown. (B, C, E and F) Data are means  $\pm$  SEM. (B and C) Statistical analyses were performed using Student's t-test. (A-F) Data are representative of at least 2 independent experiments. Source data are provided as a Source Data File.

## Supplementary Figure 3

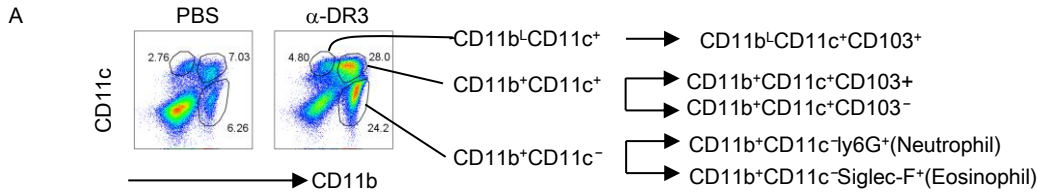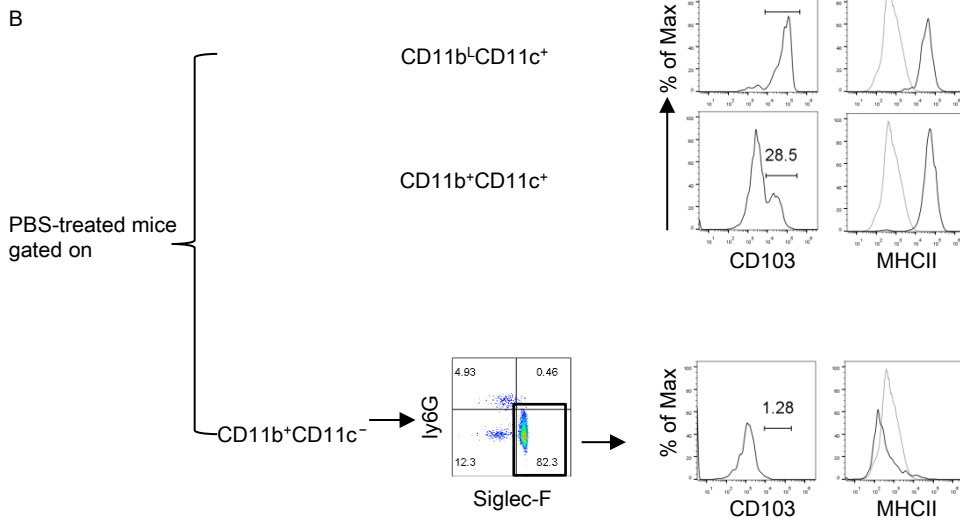

### Supplementary Figure 3. Gating strategy for analysis of CD11b<sup>+</sup> myeloid cells.

*Rag1*<sup>-/-</sup> mice were treated with PBS or  $\alpha$ -DR3 antibody and large intestinal lamina propria lymphocytes (LPLs) were isolated for analysis 4 days later. (A) CD11b<sup>L</sup>CD11c<sup>+</sup> (CD11b<sup>L</sup>CD11c<sup>+</sup>CD103<sup>+</sup>) cells, CD11b<sup>+</sup>CD11c<sup>+</sup>CD103<sup>+</sup> cells, CD11b<sup>+</sup>CD11c<sup>+</sup>CD103<sup>-</sup> cells, eosinophils (CD11b<sup>+</sup>CD11c<sup>-</sup>Siglec-F<sup>+</sup>) and neutrophils (CD11b<sup>+</sup>CD11c<sup>-</sup>Ly6G<sup>+</sup>) described in Figure 4 were identified accordingly. (B) The histograms (black solid lines) of expressions of MHCII and CD103 gated on subsets of CD11b<sup>low</sup> (CD11b<sup>L</sup>) and CD11b<sup>+</sup> cells were shown. Light-black solid line was served as a negative gating for MHCII gated on CD11b<sup>-</sup>CD11c<sup>-</sup> cells. Data are representative of at least 2 independent experiments.

## Supplementary Figure 4

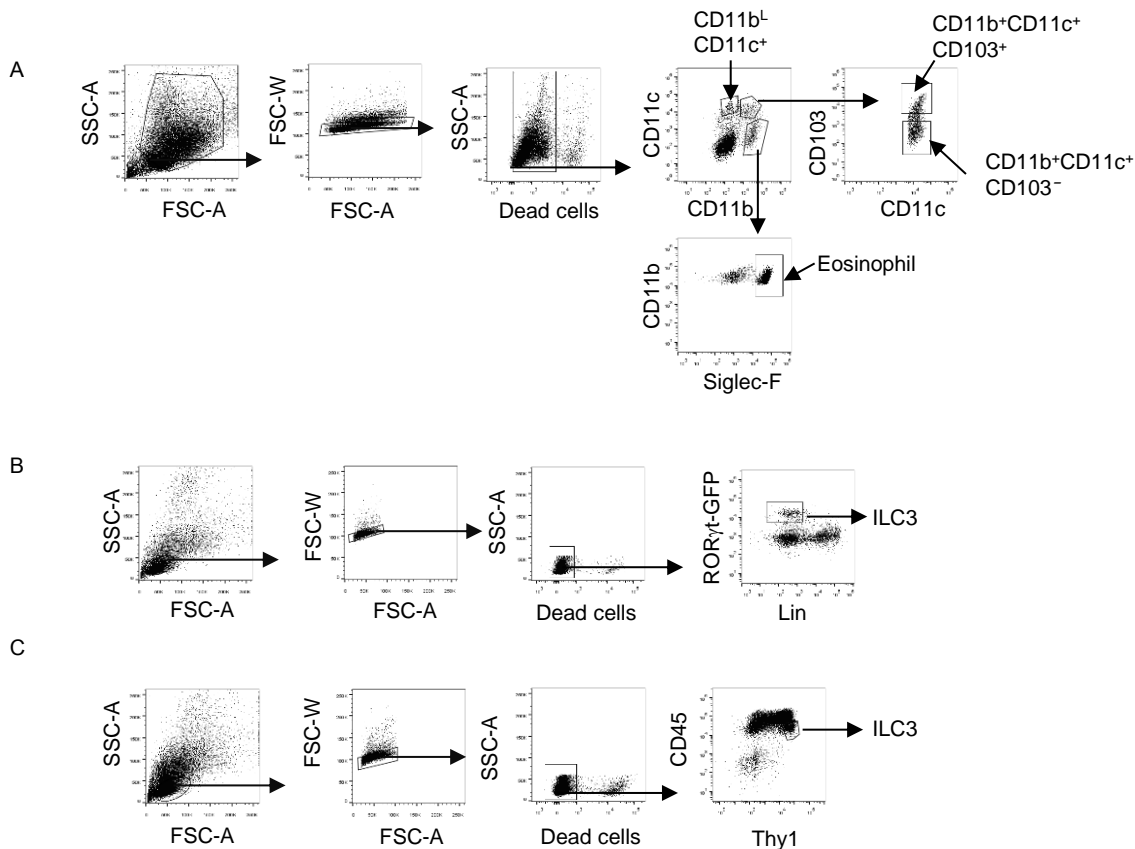

**Supplementary Figure 4. Gating strategies used for cell sorting.** (A) Gating strategy to sort CD11b<sup>L</sup>CD11c<sup>+</sup>, CD11b<sup>+</sup>CD11c<sup>+</sup>CD103<sup>+</sup> cells, CD11b<sup>+</sup>CD11c<sup>+</sup>CD103<sup>-</sup> cells and eosinophils (CD11b<sup>+</sup>CD11c<sup>-</sup>Siglec-F<sup>+</sup> cells) from *Rag1*<sup>-/-</sup> mice treated with PBS or  $\alpha$ -DR3 for experiments presented on Figure 4F and 4G. (B) Gating strategy to sort ILC3s from *Rag1*<sup>-/-</sup>*Rorc*<sup>gfp/+</sup> mice treated with PBS or  $\alpha$ -DR3 for experiments presented on Figure 5A, Supplementary Figures 5A-5B and Supplementary Data 1. (C) Gating strategy to sort ILC3s (Thy1.2<sup>high</sup>CD45<sup>intermediate</sup> cells) from *Rag1*<sup>-/-</sup> mice in experiments presented on Figure 5C.

# Supplementary Figure 5

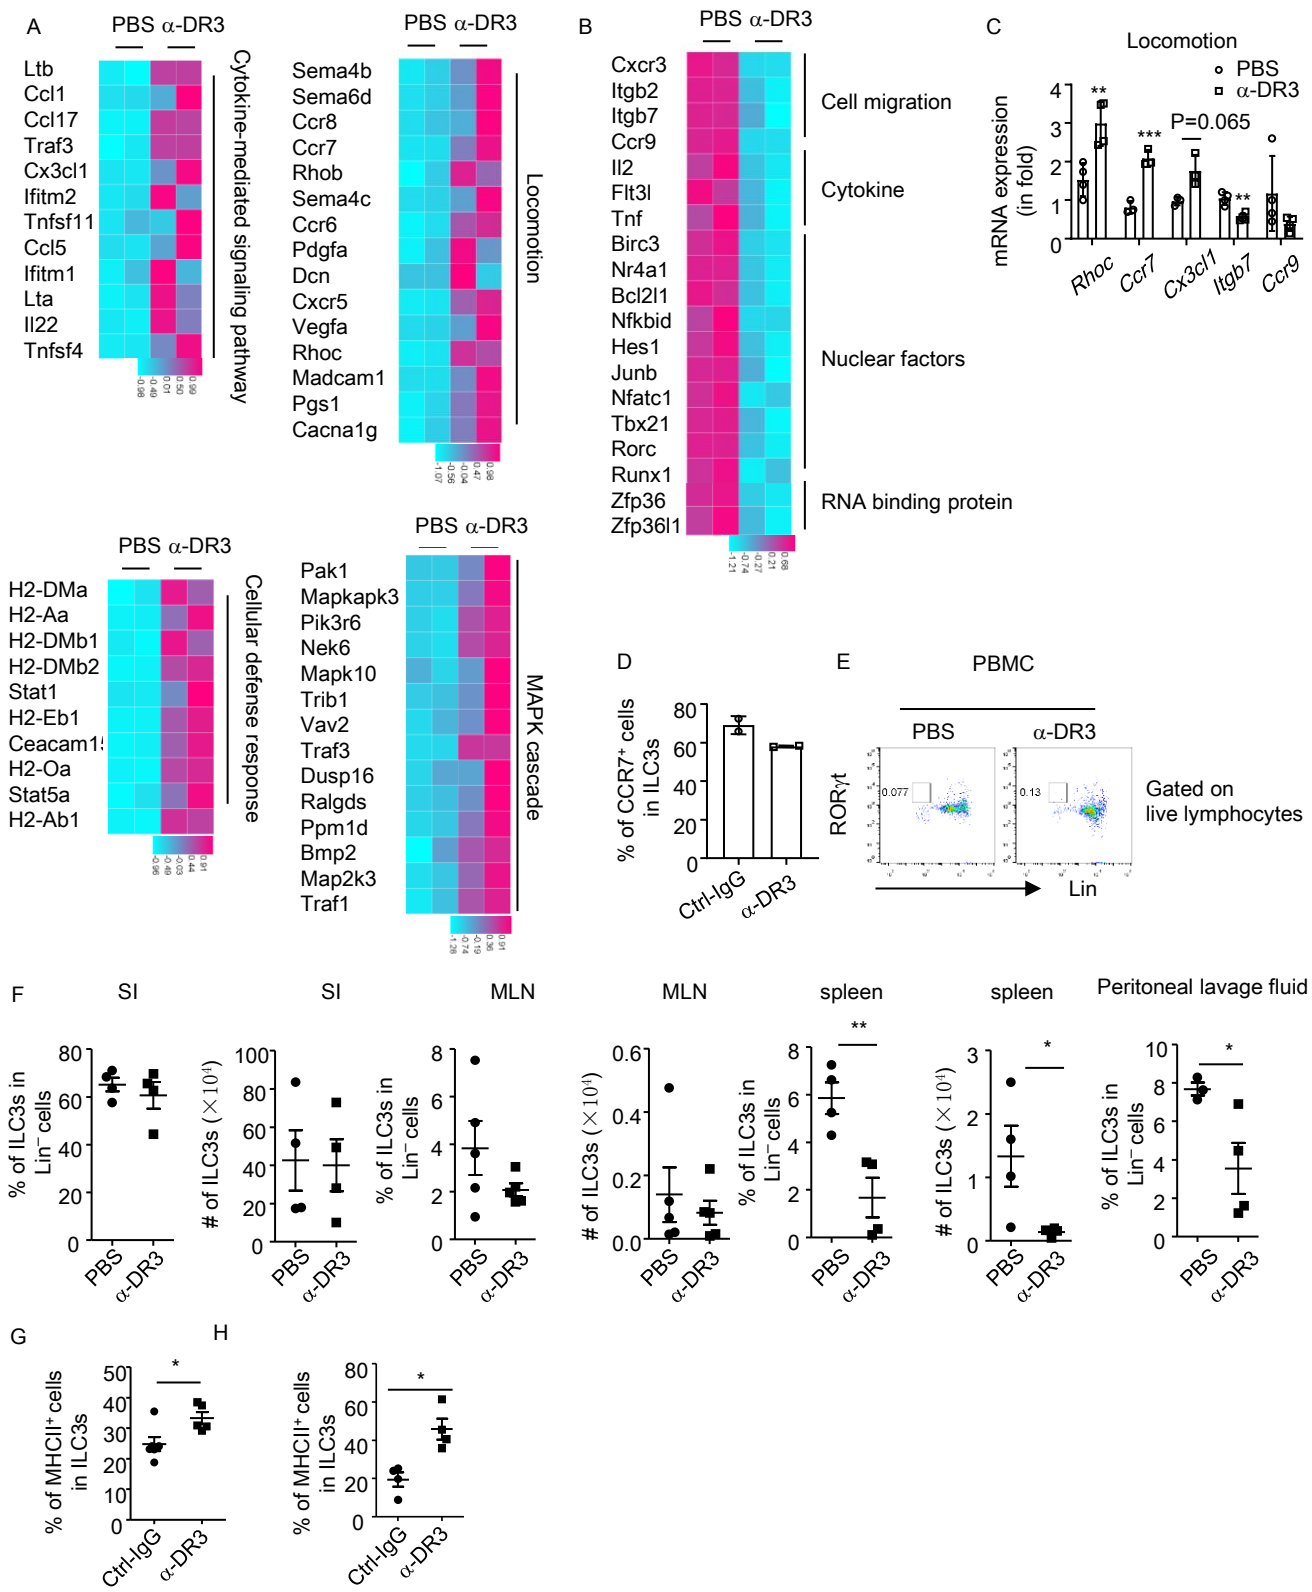

## Supplementary Figure 5. $\alpha$ -DR3 regulates gene expression relevant to locomotion and promotes MHCII expression in ILC3s.

(A-C) *Rag1*<sup>-/-</sup>*Rorc*<sup>gfp/+</sup> mice were treated with 1  $\mu$ g  $\alpha$ -DR3 once and large intestinal LPLs were isolated 3 days later. (A and B) Duplicates mRNA of FACS purified ILC3s (Lin<sup>-</sup>GFP<sup>+</sup> cells) was extracted and subjected to genome-wide analysis (RNA-seq). Representative list of upregulated genes (A) or downregulated genes (B) categorized by gene ontology in  $\alpha$ -DR3 treated mice were shown with Z-normalized heatmap. (C) Relative expression of indicated genes in ILC3s (Lin<sup>-</sup>GFP<sup>+</sup> cells) was analyzed by real-time RT-PCR and normalized to PBS group. (D-H) Wild-type mice (G) or *Rag1*<sup>-/-</sup> mice (D-F and H) were treated with PBS, Hamster IgG (Ctrl-IgG) or  $\alpha$ -DR3 antibody and large intestinal LPLs were isolated for analysis 4 days later. (D) Percentages of CCR7 expression in ILC3s (Lin<sup>-</sup>ROR $\gamma$ t<sup>+</sup>) was analyzed by flow cytometry and shown. (E and F) Small intestinal LPLs, lymphocytes from peripheral blood (PBMC), mesenteric lymph nodes (MLN), spleen and peritoneal lavage fluid were isolated. (E) Expression of lineage markers (CD3, B220, CD11b and CD11c) and ROR $\gamma$ t gated on live lymphocytes from PBMC was analyzed by flow cytometry. Percentages of ILC3s (Lin<sup>-</sup>ROR $\gamma$ t<sup>+</sup>) gated on live lymphocytes were shown. (F) Percentages and numbers of ILC3s (Lin<sup>-</sup>ROR $\gamma$ t<sup>+</sup>) from indicated groups were calculated and shown. (G and H) Percentages of MHCII expression in ILC3s (Lin<sup>-</sup>ROR $\gamma$ t<sup>+</sup>) was analyzed by flow cytometry and shown. (E, F, G and H) Data are means  $\pm$  SEM. (C) Statistical analyses were performed using paired t-test. (A-H) Data are representative of at least 2 independent experiments. Source data are provided as a Source Data File.



## Supplementary Figure 6

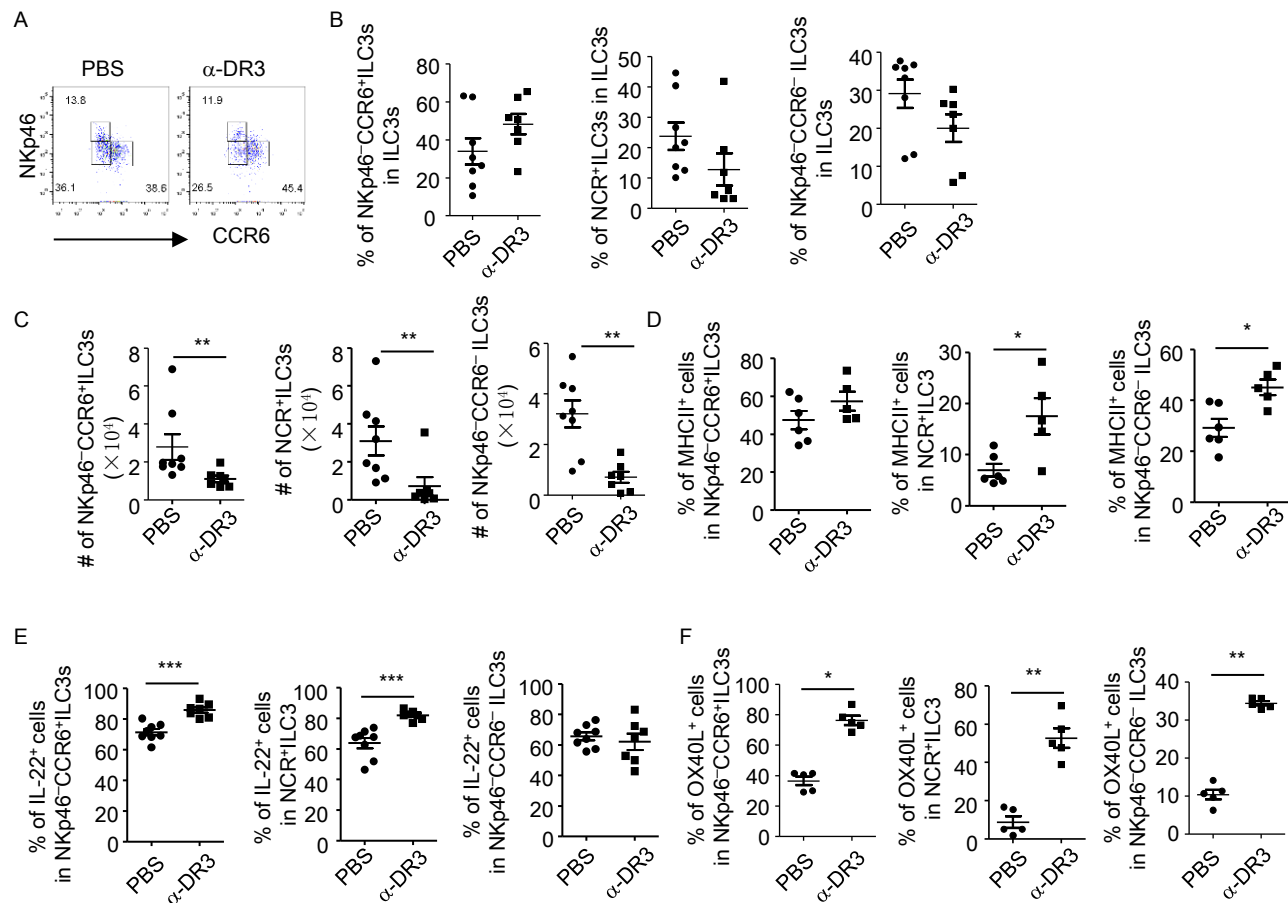

## Supplementary Figure 6. $\alpha$ -DR3 treatment promotes the expression of OX40L, IL-22 and MHCII on subsets of ILC3s

*Rag1*<sup>-/-</sup> mice were treated with  $\alpha$ -DR3 antibody (4C12) and large intestinal LPLs were isolated for analysis 4 days later. Expression of ROR $\gamma$ t, NKp46, CCR6, MHCII, OX40L, IL-22 and Lineage markers (Lin, CD3, B220, CD11b, CD11c) was analyzed by flow cytometry. (A) Expression of NKp46 and CCR6 gated on ILC3s (Lin<sup>-</sup>ROR $\gamma$ t<sup>+</sup>) was shown. (B) Percentages of CCR6<sup>+</sup>NKp46<sup>-</sup> ILC3s (Lin<sup>-</sup>NKp46<sup>-</sup> CCR6<sup>+</sup>ROR $\gamma$ t<sup>+</sup>), NCR<sup>+</sup> ILC3s (Lin<sup>-</sup>CCR6<sup>-</sup>NKp46<sup>-</sup>ROR $\gamma$ t<sup>+</sup>) and CCR6<sup>-</sup>NKp46<sup>-</sup> ILC3s (Lin<sup>-</sup>NKp46<sup>-</sup> CCR6<sup>-</sup>ROR $\gamma$ t<sup>+</sup>) gated on ILC3s (Lin<sup>-</sup>ROR $\gamma$ t<sup>+</sup>) were shown. (C) Total numbers of CCR6<sup>+</sup>NKp46<sup>-</sup> ILC3s, NCR<sup>+</sup> ILC3s and CCR6<sup>-</sup>NKp46<sup>-</sup> ILC3s from indicated groups were shown. (D-F) Expression of MHCII (D), IL-22 (E) and OX40L (F) gated on indicated subset of ILC3s was analyzed and shown. Data are means  $\pm$  SEM (A-G) Data are representative of at least 2 independent experiments. Source data are provided as a Source Data File.

## Supplementary Figure 7

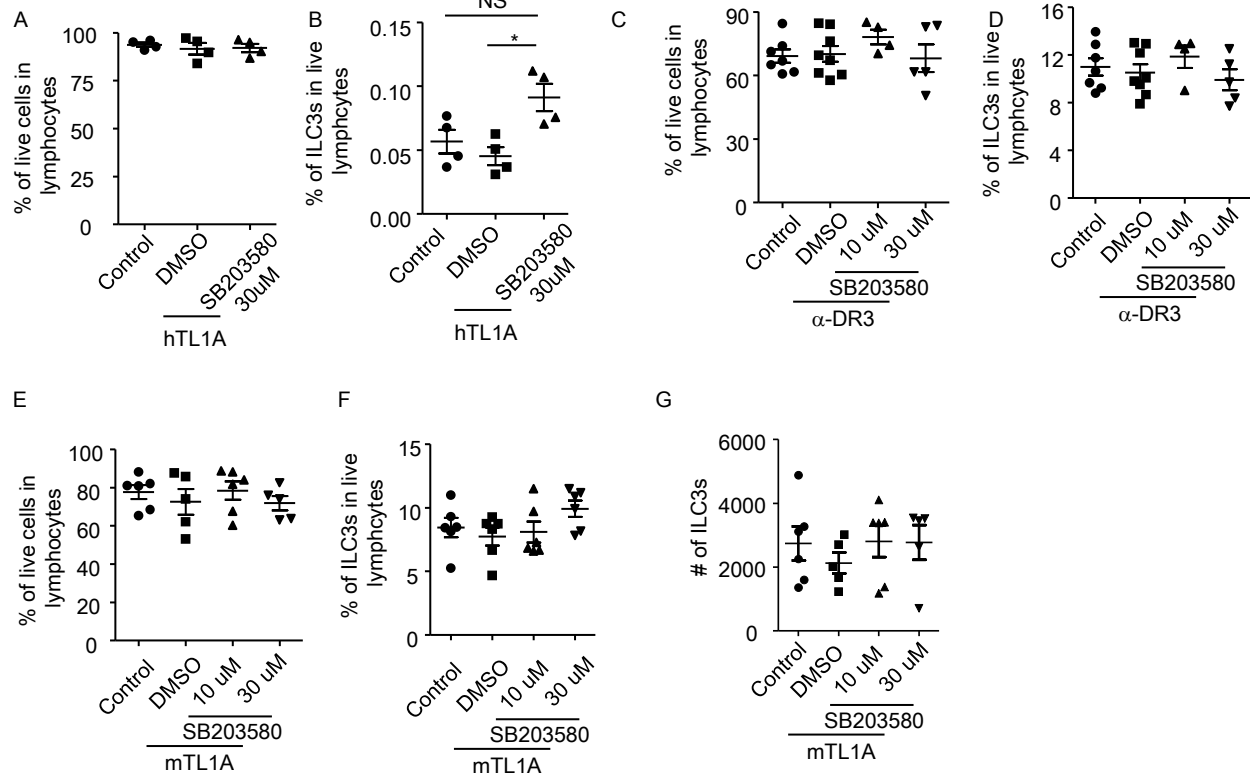

### Supplementary Figure 7. SB203580 has no cytotoxic effect on ILC3s *in vitro*

(A and B) Human tonsil lymphocytes were treated with PBS or human recombinant TL1A (100ng/ml) in the presence or absence (DMSO) of inhibitor for p38 (SB203580) at 30uM for 18 hr. Brefeldin A was added for the last 2 hr before analysis. (C-G) Large intestinal LPLs were isolated from *Rag1*<sup>-/-</sup> mice. Cells were treated with PBS,  $\alpha$ -DR3 (250ng/ml) or mouse TL1A (100ng/ml) in the presence or absence (DMSO) of inhibitor for p38 (SB203580) for 18 hr. Brefeldin A was added for the last 2 hr before analysis. (A, C and E) Percentages of live cells (dead cells-violet dye negative) gated on lymphocyte gate were analyzed by flow cytometry and shown. (B, D and F) Percentages of ILC3s (identified as Lin<sup>-</sup>CD127<sup>+</sup>CD117<sup>+</sup> for B, as Lin<sup>-</sup>ROR $\gamma$ t<sup>+</sup> for D and as CD45<sup>int</sup>Thy1.2<sup>+</sup>ROR $\gamma$ t<sup>+</sup> for F) gated on lymphocyte gate were analyzed by flow cytometry and shown. (G) Total numbers of ILC3s were calculated and shown when cells were harvested. Data are means  $\pm$  SEM (A-G) Data are representative of at least 2 independent experiments. Source data are provided as a Source Data File.

# Supplementary Figure 8

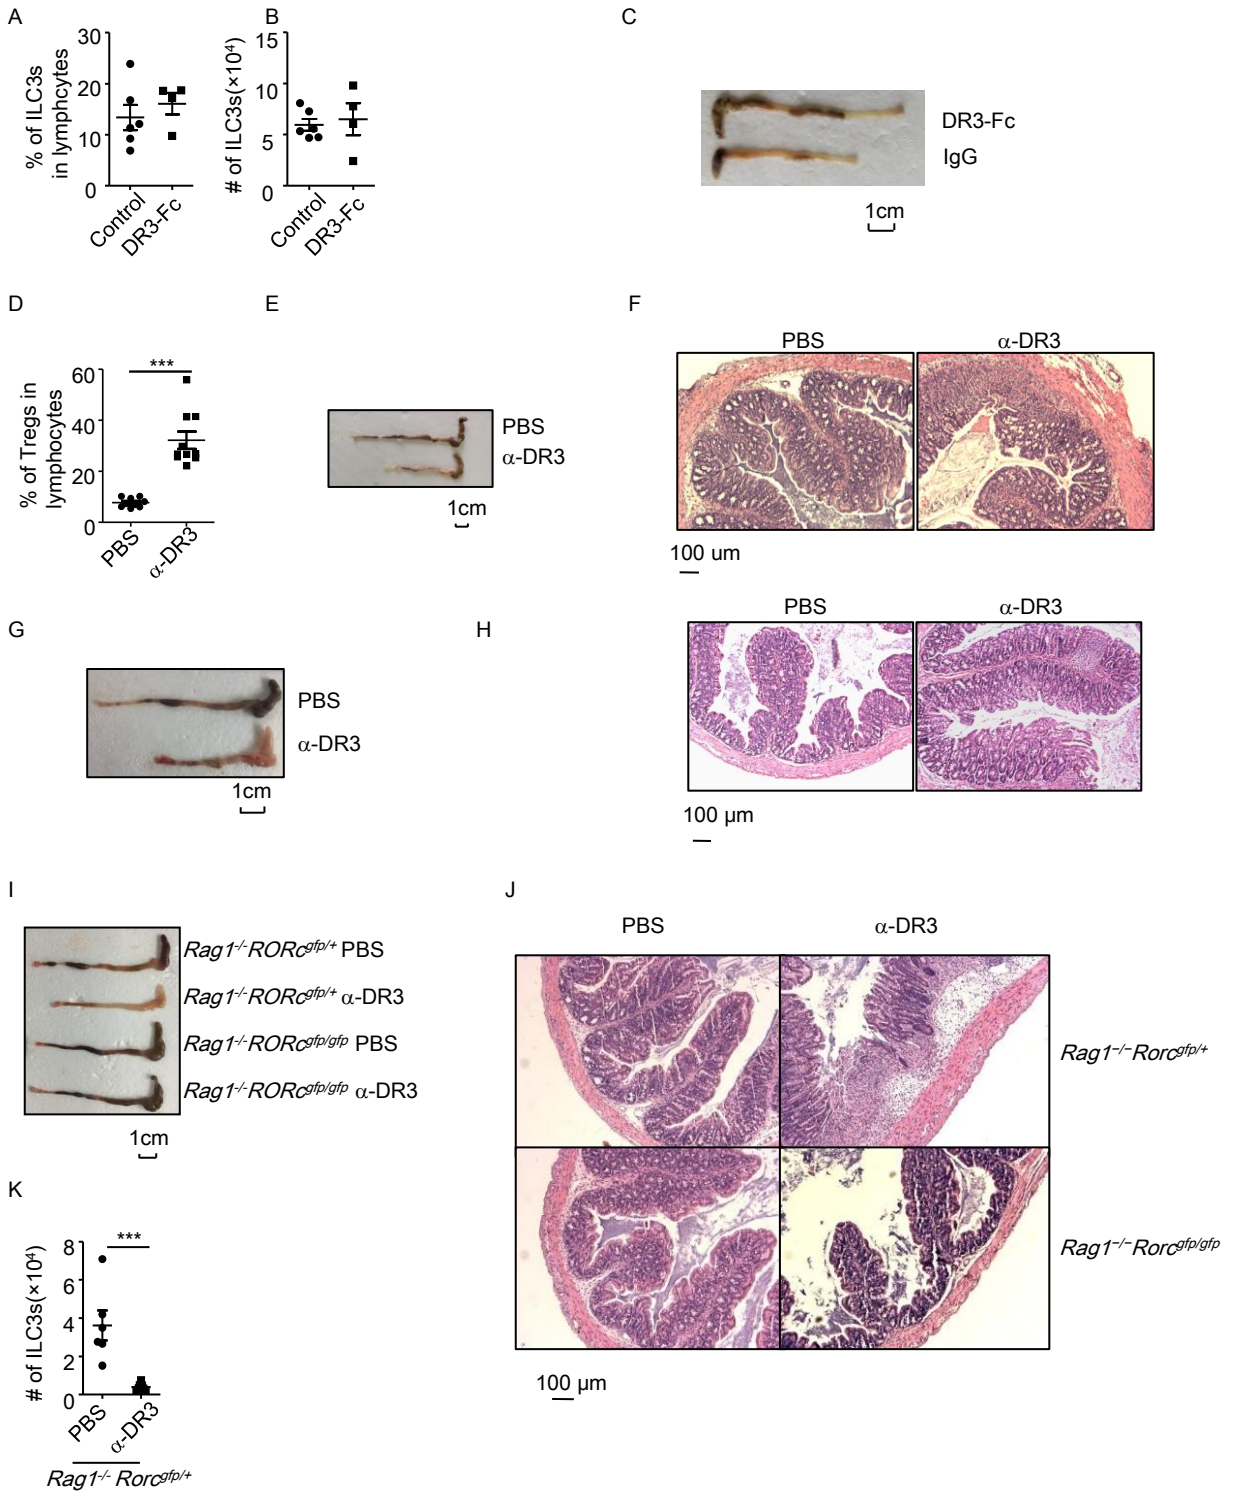

**Supplementary Figure 8. ILC3s are important for exacerbation of DSS-induced innate colitis by  $\alpha$ -DR3.**

(A and B) Littermate *Rag1*<sup>-/-</sup> mice were treated with PBS (n=2), mouse IgG (n=4) or DR3-Fc (n=4) at 200ug per mouse daily for 3 days. Large intestinal LPLs were isolated and expression of ROR $\gamma$ t and Lineage markers was analyzed by flow cytometry. Percentages of ILC3s (Lin<sup>-</sup>ROR $\gamma$ t<sup>+</sup>) in lymphocytes and total numbers of ILC3s were shown. (C) Littermate *Rag1*<sup>-/-</sup> mice were fed with 3.25% DSS in drinking water for 4 days and sacrificed on day 7. Mice were treated with 200ug of mouse IgG or DR3-Fc in 200ul PBS from day 3-6. (D-K) Littermate wild-type (D-F), *Rag1*<sup>-/-</sup> (G and H), *Rag1*<sup>-/-</sup>*Rorc*<sup>gfp/+</sup> and *Rag1*<sup>-/-</sup>*Rorc*<sup>gfp/gfp</sup> mice (I-K) were fed with 3.25% (for wild-type mice) or 3.5% (for mice of *Rag1*<sup>-/-</sup> background) in drinking water. (D-K) 2.5ug (for wild-type mice) or 1ug (for mice of *Rag1*<sup>-/-</sup> background)  $\alpha$ -DR3 antibody or PBS was i.p. injected to mice on day -2, 0 and 2 post DSS treatment. Mice were sacrificed on analysis on day 4 post DSS treatment. (D and K) Large intestinal LPLs were isolated on day 4 post DSS treatment. Expression of foxp3, ROR $\gamma$ t and Lin was analyzed by flow cytometry. (D) Percentages of Tregs (Lin<sup>+</sup>Foxp3<sup>+</sup>) in lymphocytes were shown. (K) Total numbers of ILC3s (Lin<sup>-</sup>ROR $\gamma$ t<sup>+</sup>) were shown. (C, E, G and I) Representative pictures of large intestine from indicated groups were shown. (F, H and J) Paraffin-embedded colon sections were subjected to H&E staining and representative images in indicated groups were shown. Scale bar was 100um. (A, B, D and K) Data are means  $\pm$  SEM. (A-K) Data are representative of at least two independent experiments. Source data are provided as a Source Data File.

## Supplementary Table 1. List of antibodies used for flow cytometry

Clone numbers, fluorophore and manufacture of the antibodies used for flow cytometry were shown.

| Antibody against           | Clone or Kit                              | Fluorophore       | Vendor                    | Reactivity | Dilution |
|----------------------------|-------------------------------------------|-------------------|---------------------------|------------|----------|
| B220                       | RA-6B2                                    | FITC, PE-Cyanine7 | Thermo Fisher Scientific  | mouse      | 1:400    |
| CCR7                       | 4B12                                      | PE-Cyanine7       | Thermo Fisher Scientific  | mouse      | 1:20     |
| CD103                      | 2E7                                       | APC               | Thermo Fisher Scientific  | mouse      | 1:200    |
| CD11b                      | M1/70                                     | FITC, PE-Cyanine7 | Thermo Fisher Scientific  | mouse      | 1:400    |
| CD11c                      | N418                                      | FITC, PE-Cyanine7 | Thermo Fisher Scientific  | mouse      | 1:400    |
| CD335                      | 29A1.4                                    | APC-eFluor® 780   | Thermo Fisher Scientific  | mouse      | 1:80     |
| CD3e                       | 145-2C11                                  | FITC, PE-Cyanine7 | Thermo Fisher Scientific  | mouse      | 1:400    |
| CD45                       | 30-F11                                    | PE-Cyanine7       | Thermo Fisher Scientific  | mouse      | 1:200    |
| CD90.1                     | HIS51                                     | PE                | Thermo Fisher Scientific  | mouse      | 1:200    |
| CD90.2                     | 30-H12                                    | PE                | Thermo Fisher Scientific  | mouse      | 1:200    |
| Cleaved caspase 3          | CaspGLOW™ Red Active Caspase Staining Kit | NA                | BioVision                 | mouse      | 1:100    |
| DR3                        | 4C12                                      | PE                | Biolegend                 | mouse      | 1:80     |
| Foxp3                      | FJK-16s                                   | FITC              | Thermo Fisher Scientific  | mouse      | 1:200    |
| GATA3                      | L50-823                                   | Alexa Fluor® 647  | BD Biosciences            | mouse      | 1:40     |
| GM-CSF                     | MP1-22E9                                  | FITC              | Thermo Fisher Scientific  | mouse      | 1:200    |
| Ki-67                      | SolA15                                    | PE                | Thermo Fisher Scientific  | mouse      | 1:200    |
| Ly-6G                      | 1A8-Ly6g                                  | APC               | Thermo Fisher Scientific  | mouse      | 1:200    |
| MHC II                     | M5/114.15.2                               | FITC              | Thermo Fisher Scientific  | mouse      | 1:200    |
| NKp46                      | 29A1.4                                    | FITC, APC         | Thermo Fisher Scientific  | mouse      | 1:200    |
| Phospho-p38                | D3F9                                      | NA                | Cell Signaling Technology | mouse      | 1:200    |
| RORγt                      | B2D                                       | PE, APC           | Thermo Fisher Scientific  | mouse      | 1:200    |
| Siglec-F                   | E50-2440                                  | PE                | BD Biosciences            | mouse      | 1:200    |
| CCR6                       | 140706                                    | BV421             | BD Biosciences            | mouse      | 1:20     |
| CCR6                       | 29-2L17                                   | BV421             | Biolegend                 | mouse      | 1:20     |
| IL-22                      | Poly5164                                  | PE                | Biolegend                 | mouse      | 1:200    |
| OX40L                      | RM134L                                    | APC               | Biolegend                 | mouse      | 1:200    |
| CD11b                      | ICRF44                                    | FITC              | Biolegend                 | human      | 1:20     |
| CD11c                      | 3.9                                       | FITC              | Biolegend                 | human      | 1:20     |
| CD127                      | A019D5                                    | PE                | Biolegend                 | human      | 1:40     |
| CD14                       | M5E2                                      | FITC              | BioLegend                 | human      | 1:20     |
| CD19                       | HIB19                                     | FITC              | Biolegend                 | human      | 1:50     |
| CD3                        | UCHT1                                     | FITC              | BioLegend                 | human      | 1:50     |
| CD3                        | SP34-2                                    | APC-Cy™7          | BD Biosciences            | human      | 1:50     |
| CD5                        | UCHT2                                     | FITC              | Thermo Fisher Scientific  | human      | 1:20     |
| c-Kit                      | 104D2                                     | PE/Cy7            | Biolegend                 | human      | 1:20     |
| FcεRI                      | AER-37(CRA1)                              | FITC              | Thermo Fisher Scientific  | human      | 1:50     |
| GM-CSF                     | BVD2-21C11                                | APC               | Biolegend                 | human      | 1:10     |
| Goat Anti-Rabbit IgG (H+L) | NA                                        | Alexa Fluor 647   | Jackson ImmunoResearch    | rabbit     | 1:400    |

## Supplementary Table 2. List of primers used for real-time RT-PCR

Sequences for primers used for real-time RT-PCR experiments were shown.

| Gene            | Forward                      | Reverse                      |
|-----------------|------------------------------|------------------------------|
| <i>Il22</i>     | 5'-GACCAAACCTCAGCAATCAGTC-3' | 5'-TACAGACGCAAGCATTCTCAG-3'  |
| <i>Csf2ra</i>   | 5'-ATCCTCTCGAGGCTGAGGAC-3'   | 5'-CGCGCACAGTAGGACTGC-3'     |
| <i>Csf2rb</i>   | 5'-CGAGCTACTCTGGCAGAACT-3'   | 5'-TTTGTGGCTCTGTGCTTGGG-3'   |
| <i>Il23a</i>    | 5'-CCAGTTCTGCTTGCAAAGG-3'    | 5'-GGTGATCCTCTGGCTGGA-3'     |
| <i>Il12a</i>    | 5'-TCTCTATGGTCAGCGTTCCA-3'   | 5'-TTTCTCTGGCCGTCTTCAC-3'    |
| <i>Il12b</i>    | 5'-TGGGAGTACCCTGACTCCTG-3'   | 5'-AGGAACGCACCTTTCTGGTT-3'   |
| <i>Lib</i>      | 5'-CAGCTGCGGATTCTACACCA-3'   | 5'-CATCCAAGCGCCTATGAGGT-3'   |
| <i>Tnfrsf4</i>  | 5'-CTGCCTGCAACTCTCTCTCT-3'   | 5'-TGACAACCGAATTGTTCTGC-3'   |
| <i>Zfp36</i>    | 5'-CTACGAGAGCCTCCAGTCGAT-3'  | 5'-AGCCAAAGGTGCAAAAACCAAG-3' |
| <i>Zfp361l</i>  | 5'-CAGATCCTAGTCCTTGCCCC-3'   | 5'-CGCTGGGAGTGCTGTAGTTG-3'   |
| <i>Rorgt</i>    | 5'-CCGCTGAGAGGGCTTCAC-3'     | 5'-TGCAGGAGTAGGCCACATTACA-3' |
| <i>Map2k3</i>   | 5'-CTTGGAACCGTCGCGTCT-3'     | 5'-GGATTTTCCTTTGGTCTGAGGC-3' |
| <i>Traf1</i>    | 5'-TGCCAAGCTCATTTAAAGCAC-3'  | 5'-TTGGCTACCCTATGTCACACG-3'  |
| <i>Tnfrsf15</i> | 5'-TCCCATCCTCGCAGGACTTA-3'   | 5'-GCTGTGGTGAAGGCTCAGAT-3'   |
| <i>Rhoc</i>     | 5'-CGGTGGAGCCCAAGTTTCA-3'    | 5'-GACAATGAGGAGGCAGGTCT-3'   |
| <i>Ccr7</i>     | 5'-GAAACCCAGGAAAAACGTGCT-3'  | 5'-TTGAAGCACACCGACTCGTA-3'   |
| <i>Cx3cl1</i>   | 5'-CTACTAGGAGCTGCGACAG-3'    | 5'-AAGCCACTGGGATTCGTGAG-3'   |
| <i>Ilgb7</i>    | 5'-GACCTTGGCCCCTAACTTGG-3'   | 5'-GATCCACTCCCTTCTCTTGGG-3'  |
| <i>Ccr9</i>     | 5'-GTCTCAGTCCCTACAACCTCC-3'  | 5'-CGGAATCTCTCGCCAACAAAA-3'  |
| <i>Actb</i>     | 5'-CTTCTTTGACGCTCCTTCGTT-3'  | 5'-AGGAGTCCTTCTGACCCATTG-3'  |
